# Supplementary material
Source: Springer Nature journal article supplement (https://www.springermedizin.de/resource/supplementary/12958_2010_953_MOESM3_ESM.pdf/9568878)

OVX

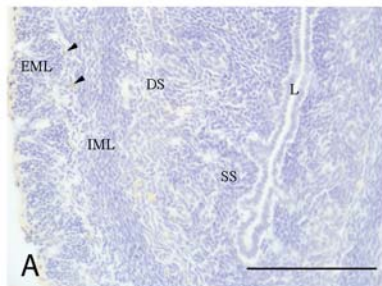

E2

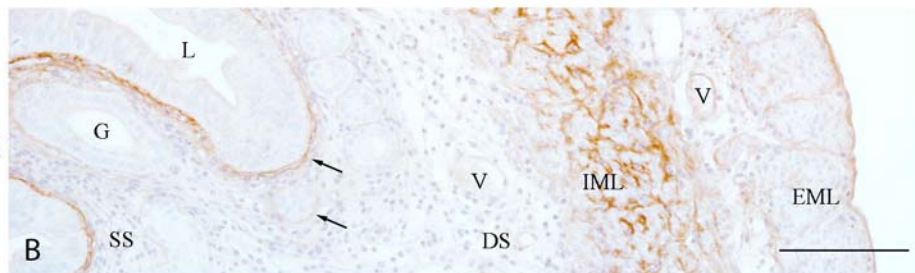

MPA

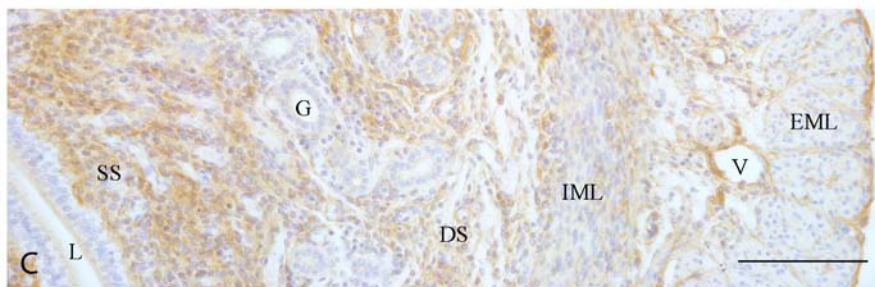

E2+MPA

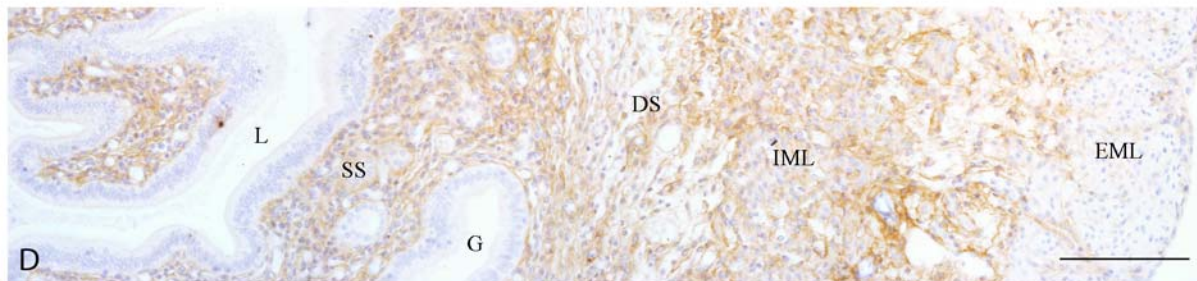

Supplement: MOESM3 [file 9568878]
